# 1 **Automated identification of Cell Types in Single Cell RNA Sequencing**

2 Feiyang Ma<sup>1</sup>, Matteo Pellegrini<sup>1,2,3\*</sup>

3

4 1. Molecular Biology Institute, University of California, Los Angeles, Los Angeles, California,  
5 United States of America

6 2. Institute of Genomics and Proteomics, University of California, Los Angeles, Los Angeles,  
7 California, United States of America

8 3. Department of Molecular, Cell, and Developmental Biology, University of California, Los  
9 Angeles, Los Angeles, California, United States of America

10

11 \* Corresponding author

12 E-mail: [matteop@mcd.db.ucla.edu](mailto:matteop@mcd.db.ucla.edu)

13

14

15

16

17

18

19

20

21

22

23

## 24 **Abstract**

25 Cell type identification is one of the major goals in single cell RNA sequencing (scRNA-seq).  
26 Current methods for assigning cell types typically involve the use of unsupervised clustering, the  
27 identification of signature genes in each cluster, followed by a manual lookup of these genes in  
28 the literature and databases to assign cell types. However, there are several limitations associated  
29 with these approaches, such as unwanted sources of variation that influence clustering and a lack  
30 of canonical markers for certain cell types. Here, we present ACTINN (Automated Cell Type  
31 Identification using Neural Networks), which employs a neural network with 3 hidden layers,  
32 trains on datasets with predefined cell types, and predicts cell types for other datasets based on  
33 the trained parameters. We trained the neural network on a mouse cell type atlas (Tabula Muris  
34 Atlas) and a human immune cell dataset, and used it to predict cell types for mouse leukocytes,  
35 human PBMCs and human T cell sub types. The results showed that our neural network is fast  
36 and accurate, and should therefore be a useful tool to complement existing scRNA-seq pipelines.

37

## 38 **Author Summary**

39 Single cell RNA sequencing (scRNA-seq) provides high resolution profiling of the  
40 transcriptomes of individual cells, which inevitably results in high volumes of data that require  
41 complex data processing pipelines. Usually, one of the first steps in the analysis of scRNA-seq is  
42 to assign individual cells to known cell types. To accomplish this, traditional methods first group  
43 the cells into different clusters, then find marker genes, and finally use these to manually assign  
44 cell types for each cluster. Thus these methods require prior knowledge of cell type canonical  
45 markers, and some level of subjectivity to make the cell type assignments. As a result, the  
46 process is often laborious and requires domain specific expertise, which is a barrier for

47 inexperienced users. By contrast, our neural network ACTINN automatically learns the features  
48 for each predefined cell type and uses these features to predict cell types for individual cells.  
49 This approach is computationally efficient and requires no domain expertise of the tissues being  
50 studied. We believe ACTINN allows users to rapidly identify cell types in their datasets, thus  
51 rendering the analysis of their scRNA-seq datasets more efficient.

52

53

54

## 55 **Introduction**

56 Single cell RNA sequencing (scRNA-seq) enables the profiling of the transcriptomes of  
57 individual cells, thus characterizing the heterogeneity of samples in manner that was not possible  
58 using traditional bulk RNA-Seq<sup>[1]</sup>. However, scRNA-seq experiments typically yield high  
59 volumes of data, especially when the number of cells is large (often many thousands). Thus, fast  
60 and efficient computational methods are essential for scRNA-seq analyses.

61

62 One common goal of scRNA-seq analyses is to identify the cell type of each individual cell that  
63 has been profiled. To accomplish this, typically cells are first grouped into different clusters in an  
64 unsupervised way, and the number of clusters allows us to approximately determine how many  
65 distinct cell types are present in the sample. Each cluster should contain cells with similar  
66 expression profiles, and so the aggregated profile of a cluster increases the signal to noise of the  
67 expression estimates. To attempt to interpret the identity of each cluster, marker genes are found  
68 as those that are uniquely highly expressed in a cluster, compared to all the other clusters. These  
69 canonical markers are then used to assign the cell types for the clusters, by cross referencing the

70 markers with lists of previously characterized cell type specific markers. While this process is  
71 able to identify cell types, there are some limitations: 1. Since the clustering method is  
72 unsupervised, all sources of variation influence the formation clusters, including effects that are  
73 not directly related to cell types such as differential expression induced by cell cycles. 2. It is  
74 often difficult to find an optimal match between the marker genes associated with each cluster  
75 and the canonical markers for specific cell types. Moreover, depending on the clustering  
76 parameters used, one cluster might contain multiple cell types, or one cell type could be split  
77 into multiple clusters. 3. Using canonical markers to assign cell types requires background  
78 knowledge of cell type specific markers, and sometimes these are not well characterized or  
79 difficult to find in the literature. Moreover, some canonical markers may be expressed by more  
80 than one cell type, and some cell types may have no known markers. 4. The same types of cells  
81 processed by two distinct scRNA-seq techniques tend to cluster separately due to technical batch  
82 effects, which complicates cell type identification in composite datasets. 5. Cell subtypes are  
83 often very similar to each other, which limits efforts to separate them accurately into different  
84 clusters. To overcome many of the limitations of existing approaches, new methods need to be  
85 developed.

86  
87 Neural networks provide a popular framework for machine learning algorithms which can be  
88 used to interpret complex datasets. As a result, neural networks have been widely used in many  
89 fields, including for the analysis of scRNA-seq data<sup>[2-5]</sup>. Since the output data from scRNA-seq is  
90 feature-enriched and well-structured, it is well suited as an input for neural networks. Here, we  
91 present ACTINN (Automated Cell Type Identification using Neural Networks) for scRNA-seq  
92 cell type identification. To overcome many of the limitations of traditional cell type identification

93 approaches described above, we used a neural network with 3 hidden layers, trained it on  
94 scRNA-seq datasets with predefined cell types, and predicted cell types in other datasets based  
95 on the trained parameters. We tested our neural network with several published datasets and  
96 show that it is fast, efficient and accurate.

97

## 98 **Results**

### 99 **Overview of the neural network**

100 We used a neural network with 3 hidden layers, each containing 100, 50 and 25 nodes,  
101 respectively (Fig 1). For the activation functions, we used the softmax function for the output  
102 layer and the rectified linear unit (ReLU) function for the other layers. We used the cross-entropy  
103 function as the loss function. The neural network model was implemented using TensorFlow  
104 (<https://www.tensorflow.org/>), and the code was written in python. We trained the neural  
105 network on 6 Intel(R) Xeon(R) CPU E5-2660 v3, and the training process took 0.5 minute to  
106 complete with 1000 cells, 11 minutes with 32,000 cells and 21 minutes with 56,000 cells. The  
107 maximum memory used in training with 56,000 cells was 18 GB. The code and datasets used in  
108 this study are available at <https://github.com/mafeiyang/ACTINN>.

109

### 110 **ACTINN model for murine cell types**

111 We used 2 datasets from the Tabula Muris Consortium (The Tabula Muris Consortium. 2018) to  
112 train and test our neural network. The datasets contain 100,605 cells from 20 mouse organs, and  
113 were sequenced by two distinct techniques, 10X Genomics (10X) and Smart-seq2 (SS2). To  
114 ensure we are using cells with high quality, we filtered out cells with less than 300 detected  
115 genes, clustered the cells, and identified marker genes for each cluster using Seurat<sup>[6]</sup>. The details

116 of the Seurat analysis can be found in the methods section. We manually assigned cell types for  
117 each cluster based on canonical markers (Fig 2A). We focused on 12 cell types and selected cells  
118 that have the same labels between our analyses and the Tabula Muris Consortium's. This process  
119 resulted in 56,112 cells (Fig 2B). Cells processed by 10X have a median of 4,787 unique  
120 molecular identifiers (UMIs) and 1,558 genes detected, and cells processed by SS2 have a  
121 median of 623,799 UMIs and 2,448 genes detected.

122  
123 To test the robustness of our neural network's performance, we first trained and tested it on cells  
124 processed by each scRNA-seq platform separately. To this end, we randomly sampled 3000 cells  
125 for testing, and used the remainder of cells for training. We repeated this process 10 times, and  
126 the average training accuracies for the 10X dataset and the SS2 dataset were 99.997% and  
127 99.963%, respectively, and the average testing accuracies were 99.883% and 99.660%,  
128 respectively (Fig 2D). These results show that our neural network can achieve very high  
129 accuracy when training and testing on datasets generated by the same technique.

130

### 131 **ACTINN overcomes batch effects introduced by different techniques**

132 Different scRNA-seq techniques can introduce significant batch effects<sup>[7]</sup> with the same cell  
133 types clustering separately due to technical artifacts (Fig 2C). To test our neural network's  
134 performance accounting for the batch effects introduced by different techniques, we trained it on  
135 cells processed by one platform and tested it on cells processed by the other. We first trained the  
136 neural network on all the 10X cells and tested it on all the SS2 cells. The training accuracy was  
137 99.997% and the testing accuracy was 98.625%. Among the 288 incorrectly predicted cells, 118  
138 monocytes were predicted as B cells, 64 monocytes were predicted as epithelial cells, 47 NK

139 cells were predicted T cells (Supplementary File 1). We then trained the neural network on the  
140 SS2 dataset and tested it on the 10X dataset. The training accuracy was 100% and the testing  
141 accuracy was 99.195%. Among the 283 incorrectly predicted cells, 150 endothelial cells were  
142 predicted as epidermis, 46 T cells were predicted as NK cells, and there were several other  
143 mispredictions (Supplementary File 1).

144

### 145 **Early stopping prevents overfitting of the training set**

146 To prevent overfitting the parameters on the training set, we randomly sampled 5,000 cells from  
147 the 10X dataset and 5,000 cells from the SS2 dataset. We trained the neural network on the 10X  
148 cells and tested it on the SS2 cells. During the training process, we recorded the accuracy and the  
149 cost after each epoch. The accuracy was defined as the percentage of cells whose cell type was  
150 correctly predicted, and the cost was the output of the cost function after each epoch. We found  
151 that the training accuracy saturated early (5 epochs), and the testing accuracy saturated at around  
152 50 epochs (Fig 2E), and the cost decreased very slowly after 50 epochs (Fig 2F). These results  
153 indicate that early stopping can be used to reduce training time and prevent overfitting.

154

### 155 **Cell type prediction using the mouse cell atlas**

156 Since the cell types from the two mouse cell atlas datasets can be accurately predicted, we  
157 combined the two datasets and used the combined dataset as the reference to predict cell types  
158 for other datasets. We first tried to predict cell types for a dataset that contains flow cytometry  
159 sorted leukocytes from mouse aorta<sup>[8]</sup>. All cells were predicted as leukocytes except for 1  
160 erythrocyte, which we think is a doublet of an erythrocyte and B cell as high expression of  
161 hemoglobin genes was detected (Fig 3A). We also carried out unsupervised analysis on the

162 dataset and clustered the cells using Seurat. Then we used the canonical markers to assign the  
163 cell types for each cluster (Fig 3B). Most cells had the same cell type assignment by the two  
164 methods. However, our neural network detected some natural killer (NK) cells, which were in  
165 the same cluster with the T cells, and were assigned as T cells in the unsupervised clustering. We  
166 checked the expression of CD3D, CD8A and GZMA (Fig 3C), and found no expression of  
167 CD3D and CD8A, but high expression of GZMA in the NK cells, which suggests that these are  
168 likely NK cells.

169

170 It is generally thought that human and mouse share similar cell types, and the same cell type  
171 from human and mouse share similar expression profiles. To test this, we trained our neural  
172 network on the mouse cell atlas datasets and used the parameters to predict the cell types for a  
173 human peripheral blood mononuclear cell (PBMC) dataset. We found 4 main populations in the  
174 PBMC dataset, namely, B cells, monocytes, NK cells and T cells (Fig 3D). We plotted the  
175 canonical markers for these 4 populations (Fig 3E) and found that the predicted cell types  
176 matched the expected marker expression. These results suggest that the mouse cell atlas datasets  
177 can be used as a reference to identify cell types for both human and mouse cells.

178

### 179 **ACTINN accurately predicts cell subtypes**

180 Although it is relatively easy to distinguish different cell types in scRNA-seq using the  
181 unsupervised clustering methods, it is more difficult to further divide one cell type into cell  
182 subtypes. Here, we collected 5 publicly available datasets<sup>[9]</sup>, each containing one flow cytometry  
183 sorted T cell subtype. We merged these datasets and selected the cells that have the same labels  
184 between our analyses and the flow cytometry sorting, and then used these cells as a reference for



185 the neural network. We then clustered the selected cells and identified markers (Fig 4A and 4B)  
186 for each sub cell type using Seurat. For the test set, we used the T cells from the human PBMC  
187 datasets mentioned above.

188  
189 To test our neural network's ability to predict cell subtypes, we trained it on the T cell subtype  
190 reference, and predicted the subtypes for the T cells from the PBMC dataset (Fig 4D). We then  
191 identified marker genes for each predicted subtype. As expected, the marker genes matched the  
192 ones from the reference (Fig 4E). These results show that our neural network can be used to  
193 accurately identify cell subtypes. We found that the subtypes predicted by the neural network did  
194 not perfectly match the cell types associated with the Seurat clusters (Fig 4C). Some clusters  
195 contained different subtypes and some subtypes were composed of several clusters. We think the  
196 difference was influenced by two factors: 1. Unsupervised clustering considers all variance in the  
197 data, while the neural network is trained to find the difference between the subtypes; 2. It is  
198 difficult to set the parameters optimally for the unsupervised analysis, which can result in  
199 multiple cell types in one cluster or multiple clusters for one cell type.

200

## 201 **Discussion**

202 scRNA-seq provides high resolution profiling of the transcriptomes of single cells. Typically, the  
203 first step in scRNA-seq analysis is to assign each cell a cell type based on our prior knowledge of  
204 marker genes. Current methods for cell type assignment first cluster the cells in an unsupervised  
205 manner and rely on the canonical markers to identify the cell types for each cluster. However,  
206 this approach has several limitations, including the fact that the clusters may not optimally  
207 segregate single cell types, and certain cell types may not have previously characterized markers.

208 Moreover, these methods are computationally intensive, especially when the number of cells  
209 becomes large. To render cell type identification in scRNA-seq more efficient, we employed a  
210 neural network, trained it on cells with predefined cell types, and used it to predict cell types for  
211 new datasets.

212

213 We first obtained and cleaned two datasets from the Tabula Muris Consortium, then trained and  
214 tested our neural network on these datasets with or without batch effect introduced by different  
215 scRNA-seq platforms. The training accuracy always approached 100%, and the testing accuracy  
216 was around 99.8% within a platform and 99.0% when testing and training are performed across  
217 different platforms. As the cell types in the two Tabula muris atlas datasets can be mutually  
218 predicted using our neural network, we merged them and used the combined datasets as the  
219 reference to predict cell types for other datasets. The predicted cell types were well matched with  
220 the cell types assigned using the canonical markers for both the mouse and human datasets. We  
221 also trained and tested the neural network on 5 T cell subtypes and found that the predicted  
222 subtypes showed the same markers as the reference subtypes, which suggests that our neural  
223 network can be used to predict sub cell types as well.

224

225 Compared to the traditional unsupervised methods used for cell type identification, our neural  
226 network has the following advantages: 1. It uses all the genes to capture the features for each cell  
227 type instead of relying on a limited number of canonical markers. 2. It focuses the analysis on the  
228 signal associated with the variance between cell types, while unsupervised clustering tends to be  
229 affected by other sources of cell type independent variation (i.e. platform or cell cycle). 3. It  
230 requires no background knowledge of cell type markers, while the unsupervised method requires

231 users to have prior knowledge of canonical markers for each cell type in their data. 4. It is much  
232 more computationally efficient than the traditional approach. Moreover, users can subsample the  
233 reference cells to make the computation of the neural network less compute intensive and more  
234 memory efficient.

235  
236 There are some aspects of our approach that could be improved in the future. As the neural  
237 network is supervised, the quantity and quality of the reference data are critical. We anticipate  
238 that with time more cell types from larger atlases should be used to train a more comprehensive  
239 neural network. Also, better pairing of reference and test sets will undoubtedly improve  
240 performance. For example, the soon to be developed human cell atlas should be used to predict  
241 human cell types instead of the mouse cell atlas. Nonetheless, we showed that even with the  
242 current reference data our neural network is computationally efficient and accurate, and should  
243 improve cell type identification pipelines.

244

## 245 **Materials and Methods**

### 246 **Data normalization**

247 We used several publicly available datasets in our analyses. The mouse cell atlas datasets were  
248 collected from <https://tabula-muris.ds.czbiohub.org/>. The CD45 sorted leukocyte datasets were  
249 published in Winkels et al<sup>[8]</sup>. The T cell subtypes and PBMC datasets were collected from  
250 <https://support.10xgenomics.com/single-cell-gene-expression/datasets>.

251 To filter and normalize the data, we first identified genes that were detected in both training set  
252 and test set. The training set and the test set were then merged into one matrix based on the  
253 common genes. Next, each cell's expression value was normalized to its total expression value

254 and multiplied by a scale factor of 10,000. The counts were increased by 1, and the log2 value  
255 was calculated. To filter out outlier genes, the genes with the highest 1% and lowest 1%  
256 expression were removed. The gene with the highest 1% and the lowest 1% standard deviation  
257 were also removed. Finally, the matrix was split into the training set and the test set.

258

### 259 **Neural network configuration**

260 We used a neural network that contains an input layer, 3 hidden layers, and an output layer. The  
261 input layer had a number of nodes equal to the number of genes in the training set. The 3 hidden  
262 layers had 100, 50 and 25 nodes, respectively. The output layer had a number of nodes equal to  
263 the number of cell types in the training set. Forward propagation was implemented as:

$$x^{[i]} = g(W^{[i]}x^{[i-1]} + b^{[i-1]})$$

264 Where  $x^{[i]}$  represents the output of the  $i$ th layer ( $x^{[0]}$  represents the input layer),  $b^{[i]}$  represents  
265 the intercept of the  $i$ th layer,  $W^{[i]}$  represents the weight matrix of the  $i$ th layer, and  $g$  represents  
266 the activation function used in the neural network. Specifically, for the activation function, a  
267 rectified linear unit (ReLU) function was used for the input and hidden layers, which is defined  
268 as:

$$ReLU(x) = \max(0, x)$$

269 For the output layer, the softmax function was used, which is defined as:

$$softmax(x_{[j]}) = \frac{\exp(x_{[j]})}{\sum_{j=1}^k \exp(x_{[j]})}$$

270 Where  $x_{[j]}$  represents the  $j$ th element of the input vector for the output layer, which has  $k$   
271 elements, representing a total of  $k$  cell types in the training set.

272 For the loss function, we used the cross-entropy function, which is defined as:

$$H(y', y) = \sum_{j=1}^k (y_{[j]} \log(y'_{[j]}) + (1 - y_{[j]}) \log(1 - y'_{[j]}))$$

273 Where vector  $y$  represents the true label for the cell,  $y_{[j]}$  is defined to be 1 if the cell is the  $j$ th  
274 cell type, and the other elements in  $y$  are defined to be 0.  $y'$  represents the output of the output  
275 layer, and  $y'_{[j]}$  represents the posterior probability that the cell is the  $j$ th cell type. L2  
276 regularization was added to the loss function.

277

### 278 **Parameters used in the neural network**

279 The neural network model was implemented using TensorFlow (<https://www.tensorflow.org/>),  
280 and the code was written in python. The parameters were initialized with Xavier initializer<sup>[10]</sup>.  
281 The starting learning rate was set to 0.0001 with staircase exponential decay, the decay rate was  
282 set to 0.95, and the decay step was set to 1000. This means that after every 1000 global steps, the  
283 learning rate would be the original learning rate multiplied by 0.95. 50 epochs were used to train  
284 the neural network with a mini batch size of 128, which is the number of samples used in  
285 training at every global step. The L2 regularization rate was set to 0.005.

286

### 287 **Unsupervised single cell analysis**

288 To identify different cell types and find signature genes for each cell type, Seurat<sup>[6]</sup> was used to  
289 analyze the digital expression matrix generated by scRNA-seq. Specifically, in Seurat, cells with  
290 less than 1000 unique molecular identifiers (UMIs) and genes detected in less than 10 cells were  
291 first filtered out. Second, highly variable genes were detected and used for further analysis. Third,  
292 the data was scaled for sequencing depth of each cell. Fourth, principle component analysis  
293 (PCA) and t-distributed stochastic neighbor embedding (tSNE) were used to reduce the

294 dimension and plot the data on a two-dimensional graph. Lastly, a graph-based clustering  
295 approach was used to cluster the cells, then signature genes were found and used to define cell  
296 type for each cluster.

297

## 298 **Acknowledgments**

299 We thank Dr. Shawn Cokus for his suggestions on early stopping of the neural network. We also  
300 thank Dr. Andrew Ng for his Deep Learning class on Coursera.

301

## 302 **References**

- 303 1. Hwang B, Lee JH, Bang D. Single-cell RNA sequencing technologies and bioinformatics  
304 pipelines. *Exp Mol Med*. 2018;50(8):96. Published 2018 Aug 7. doi:10.1038/s12276-018-  
305 0071-8
- 306
- 307 2. Lin C, Jain S, Kim H, Bar-Joseph Z. Using neural networks for reducing the dimensions  
308 of single-cell RNA-Seq data. *Nucleic Acids Res*. 2017;45(17):e156.
- 309
- 310 3. Shaham U, Stanton KP, Zhao J, et al. Removal of batch effects using distribution-  
311 matching residual networks. *Bioinformatics*. 2017;33(16):2539-2546.
- 312
- 313 4. Lopez, R., et al., Deep generative modeling for single-cell transcriptomics. *Nature*  
314 *Methods*, 2018. 15(12): p. 1053-1058.

315

- 316 5. Cho, H., Berger, B. & Peng, J. Generalizable and Scalable Visualization of SingleCell  
317 Data Using Neural Networks. *Cell Syst* 7, 185-191 e184, doi:10.1016/j.cels.2018.05.017  
318 (2018).  
319
- 320 6. Butler, A., Hoffman, P., Smibert, P., Papalexi, E. Satija, R. Integrating single-cell  
321 transcriptomic data across different conditions, technologies, and species. *Nat.*  
322 *Biotechnol.* 36, 411–420 (2018).  
323
- 324 7. Haghverdi L, Lun ATL, Morgan MD, Marioni JC. Batch effects in single-cell RNA-  
325 sequencing data are corrected by matching mutual nearest neighbors. *Nat Biotechnol.*  
326 2018;36(5):421-427.  
327
- 328 8. Winkels H, Ehinger E, Vassallo M, et al.. Atlas of the immune cell repertoire in mouse  
329 atherosclerosis defined by single-cell RNA-sequencing and mass cytometry. *Circ Res.*  
330 2018;122:1675–1688. doi: 10.1161/CIRCRESAHA.117.3125  
331
- 332 9. Zheng GX, Terry JM, Belgrader P, et al. Massively parallel digital transcriptional  
333 profiling of single cells. *Nat Commun.* 2017;8:14049. Published 2017 Jan 16.  
334 doi:10.1038/ncomms14049  
335
- 336 10. Xavier Glorot, Yoshua Bengio. Proceedings of the Thirteenth International Conference  
337 on Artificial Intelligence and Statistics, PMLR 9:249-256, 2010.  
338

339

340

## 341 **Figures and Tables**

### 342 **Fig 1. Neural network configuration.**

343

344 **Fig 2. Training and testing of the neural network on the Tabula Muris Atlas.** (a) Cell types  
345 obtained from the TMA. (b) Number of cells obtained for each cell type from each technique. (c)  
346 The same cell type tends to cluster separately by techniques. (d) Training and testing accuracy of  
347 the neural network when trained and tested using cells processed by the same technique. (e)  
348 Training and testing accuracy after each epoch when trained with 5,000 10X cells and tested with  
349 5,000 SS2 cells. (f) Cost after each epoch when trained with 5,000 10X cells and tested with  
350 5,000 SS2 cells.

351

352 **Fig 3. Neural network predicts cell types for human and mouse datasets.** (a) Cell types  
353 predicted by the neural network for the mouse leukocyte dataset. (b) Cell types identified by  
354 unsupervised clustering and canonical markers for the mouse leukocyte dataset. (c) Violin plots  
355 showing 3 genes' expression level in the NK and T cells from the mouse leukocytes. (d) Cell  
356 types predicted by the neural network for the human PBMC dataset. (e) TSNE plots showing 4  
357 marker genes' expression for the human PBMC dataset.

358

359 **Fig 4. Neural network predicts sub cell types.** (a) TSNE plots showing 6 marker genes'  
360 expression for the reference T cell subtypes. (b) T cell subtypes obtained to train the neural  
361 network. (c) T cells from the human PBMC were grouped into 7 clusters by the unsupervised



362 method. (d) Subtypes predicted for the T cells from the human PBMC. (e) Dot plot showing the  
363 expression of 6 genes for the predicted subtypes, dot size represents the percentage of cells  
364 expressing the gene, color scale represents the expression level of the gene.

365

## 366 **Supporting Information**

367 **Supplementary File 1.** This file contains 4 tables that tells the number of accurately and  
368 inaccurately predicted cells when the neural network was trained and test across the 10X and  
369 SS2 datasets.

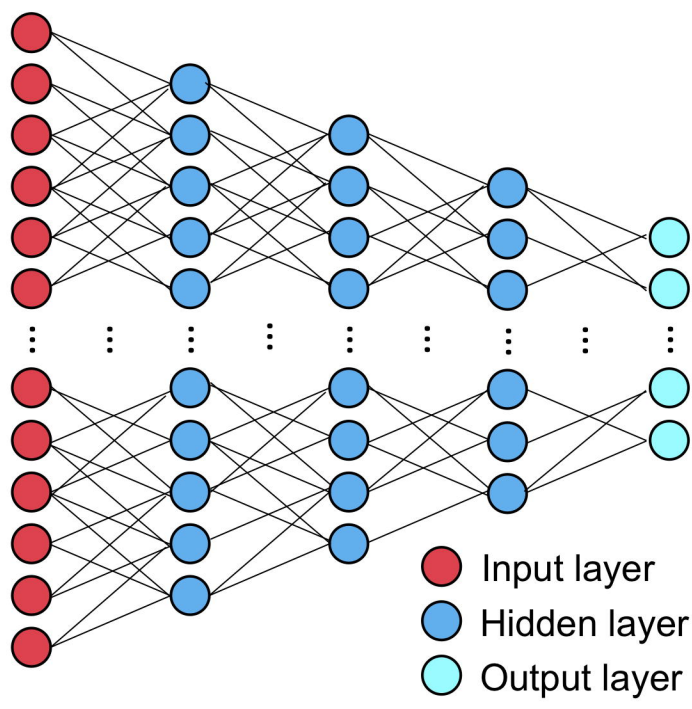

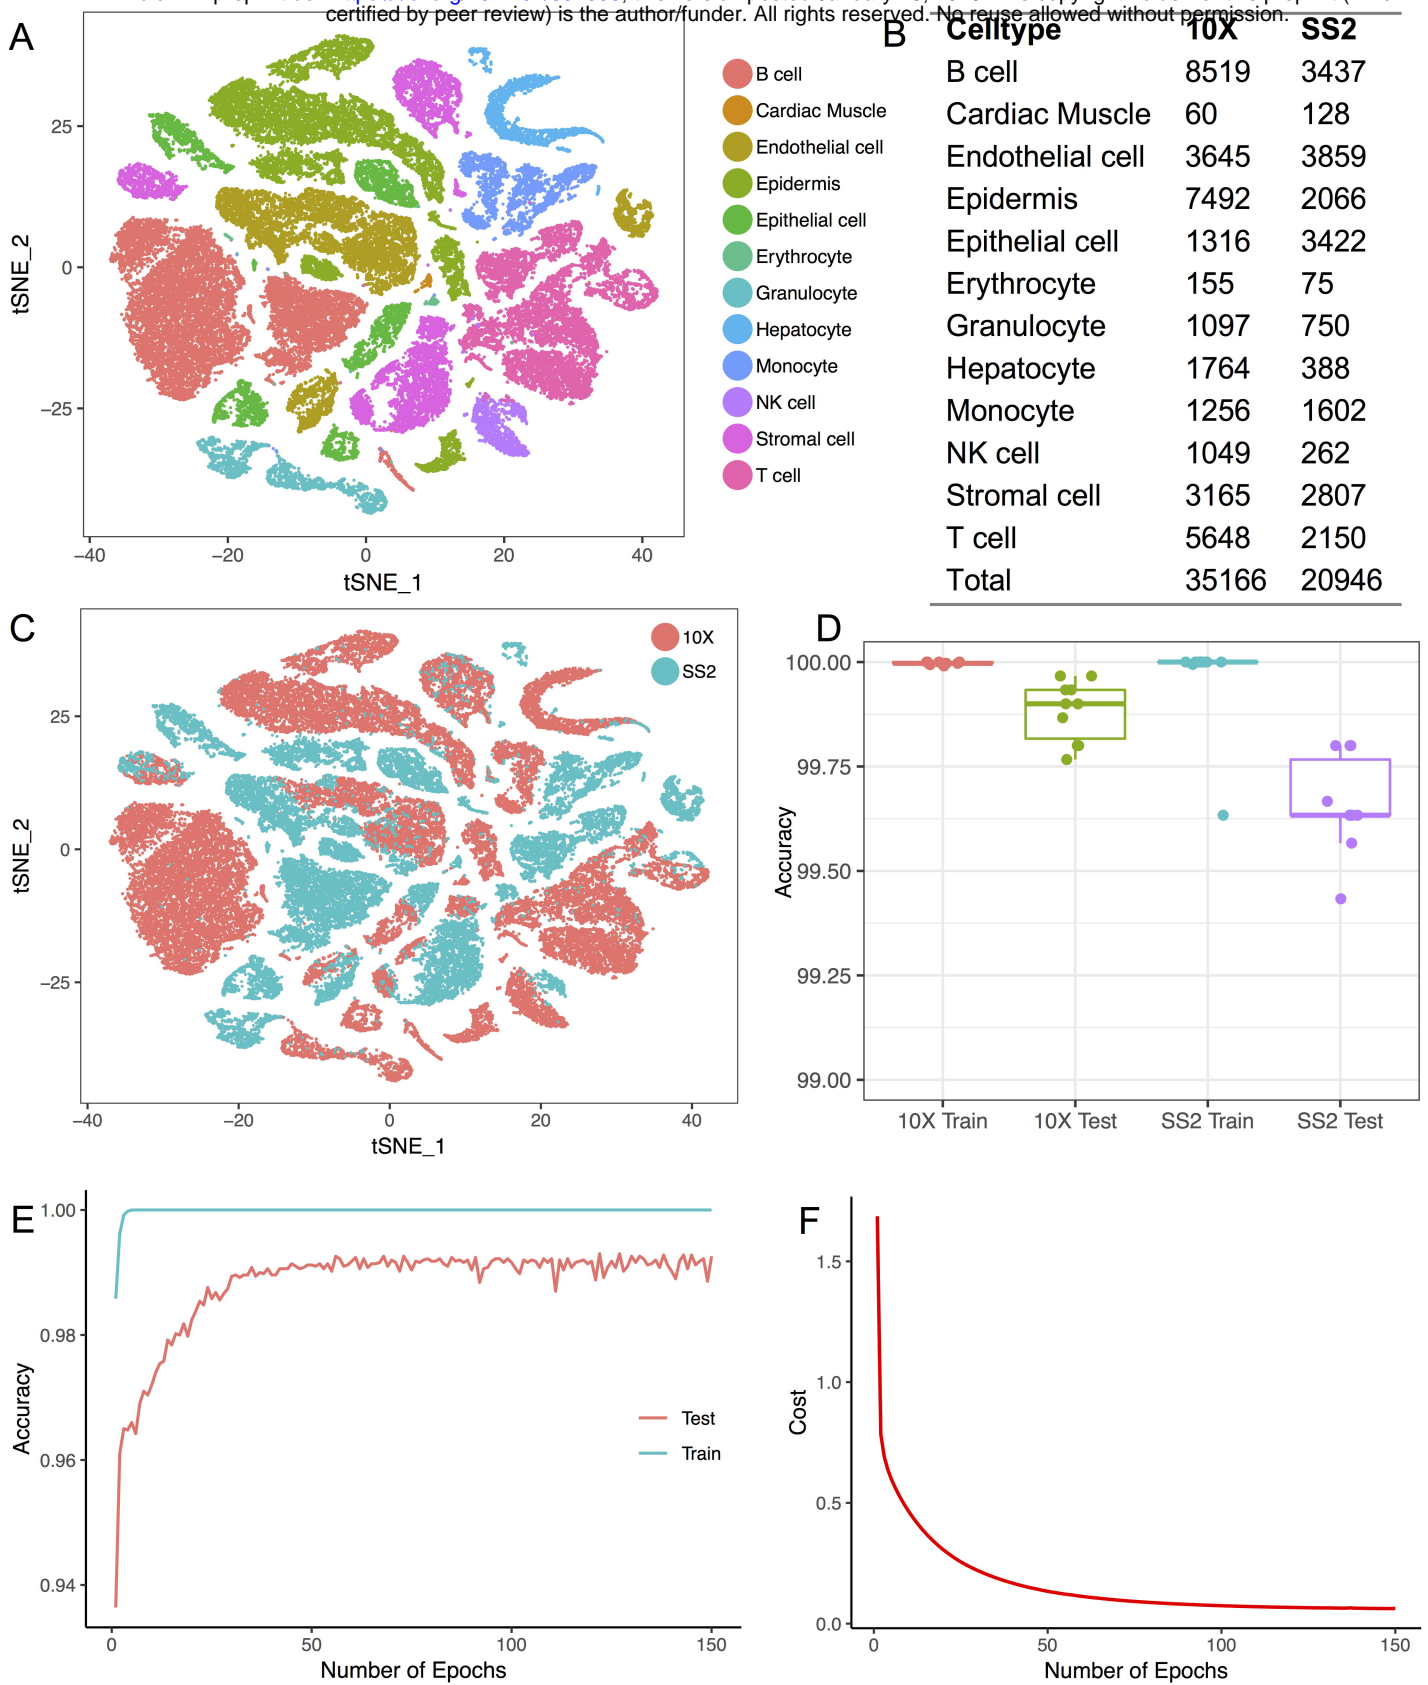

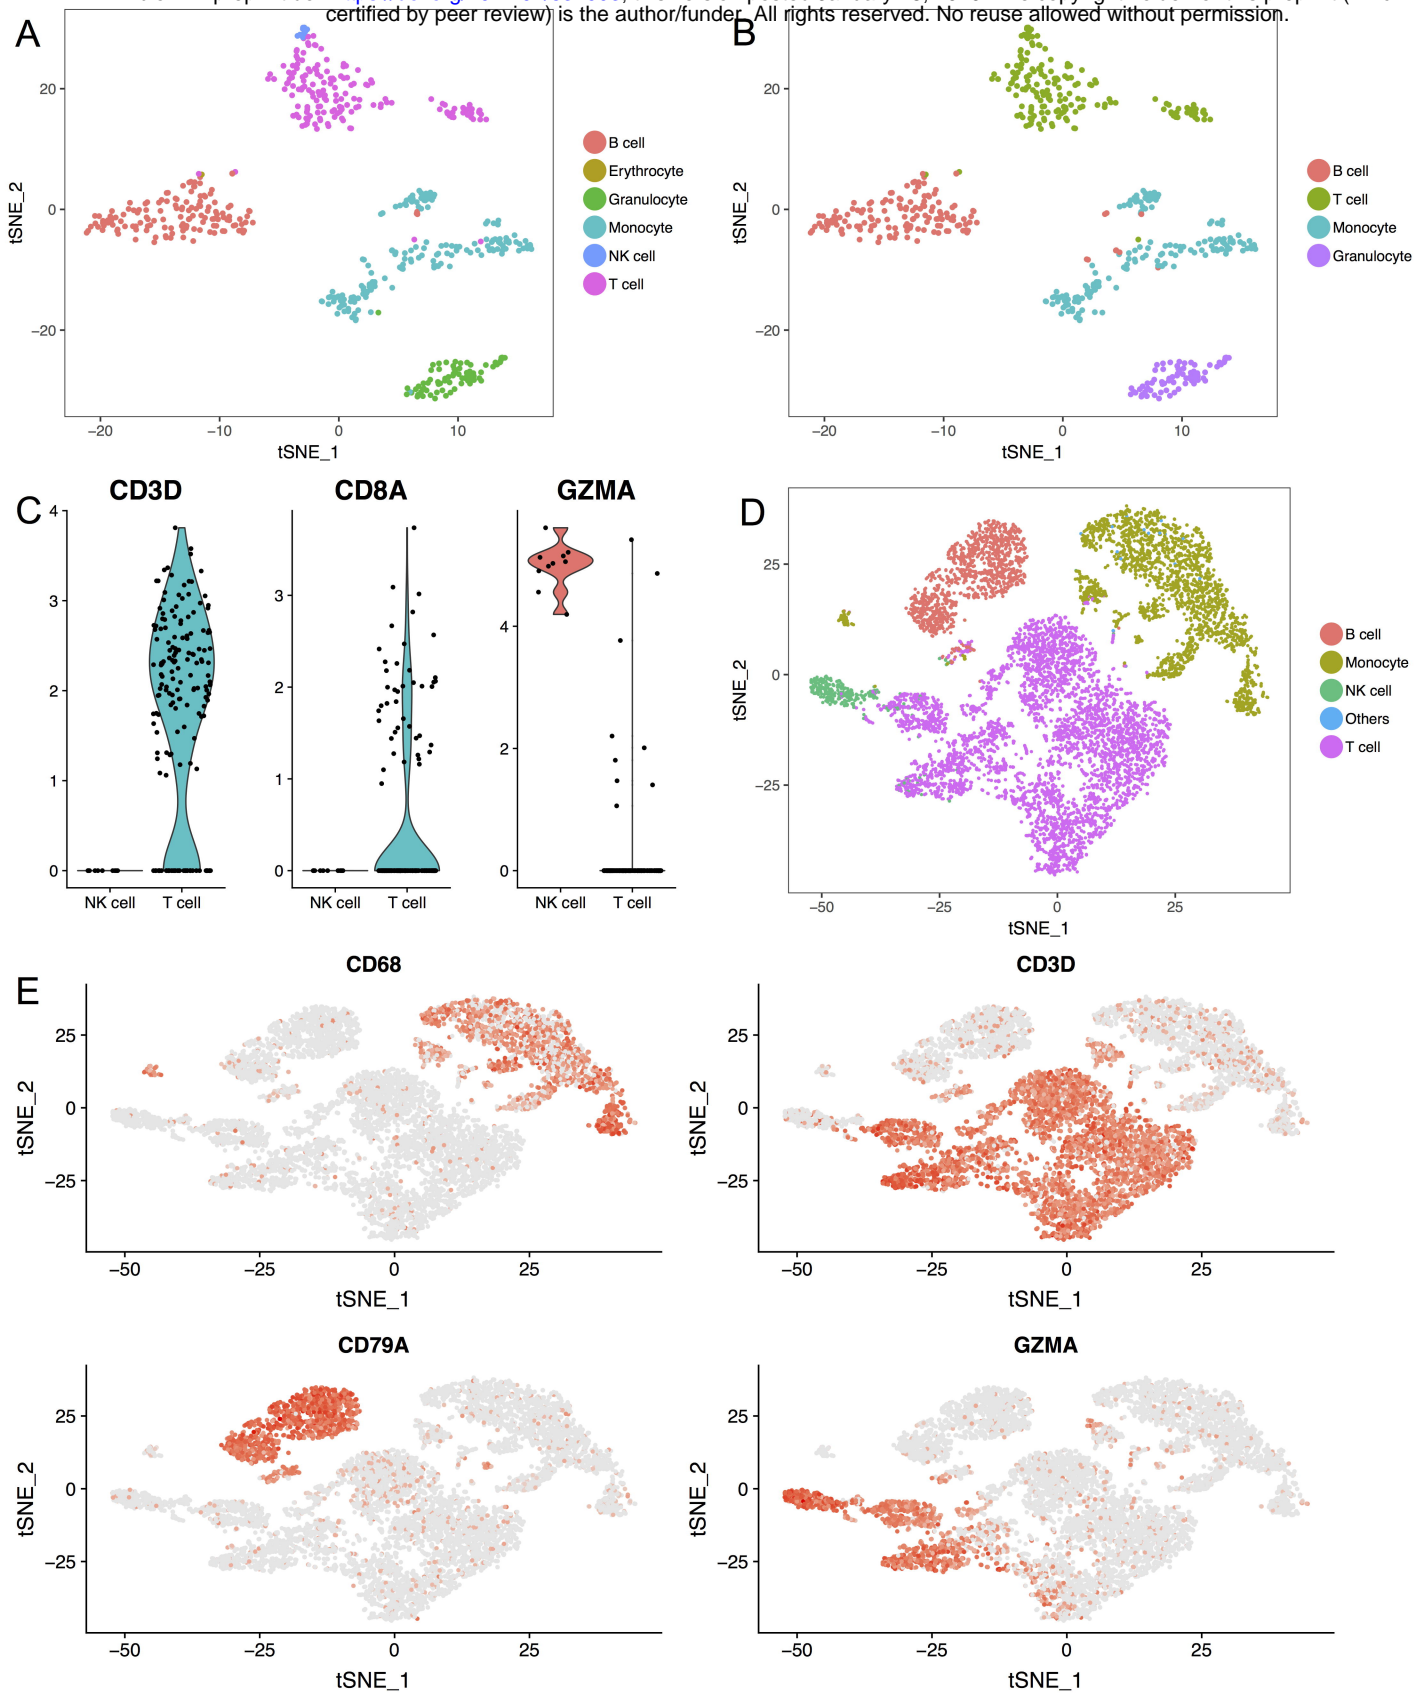

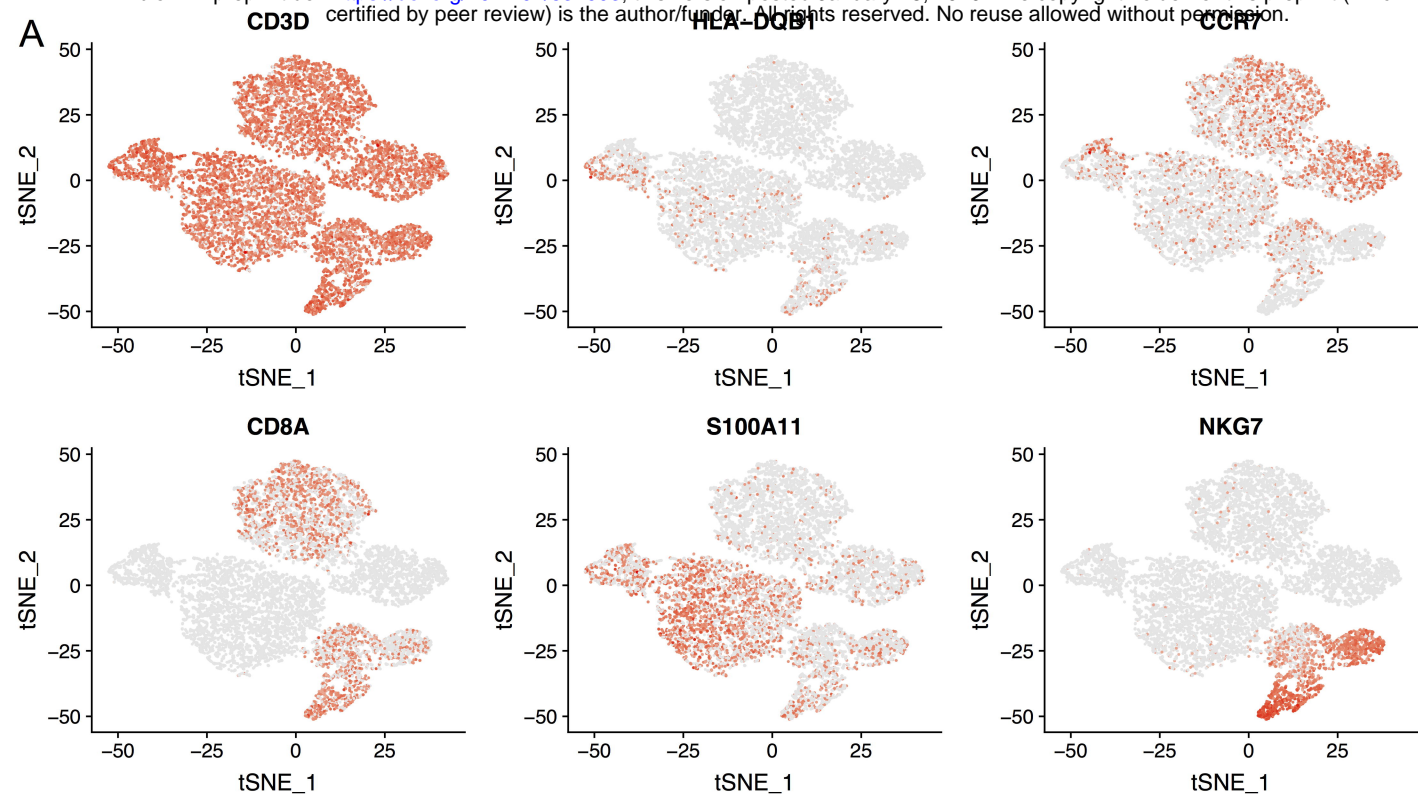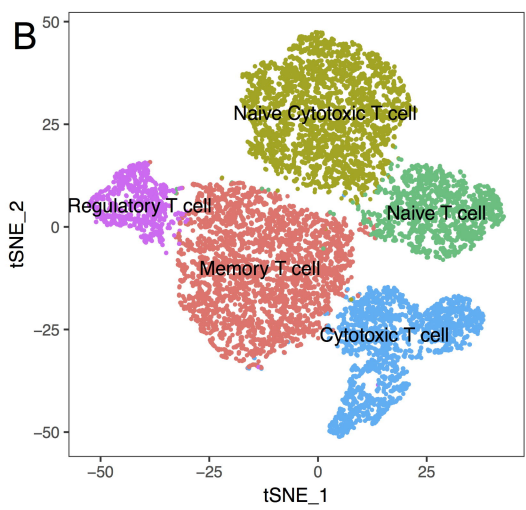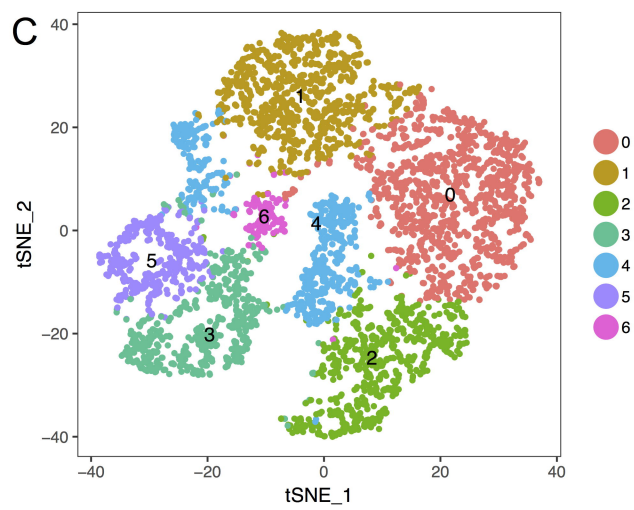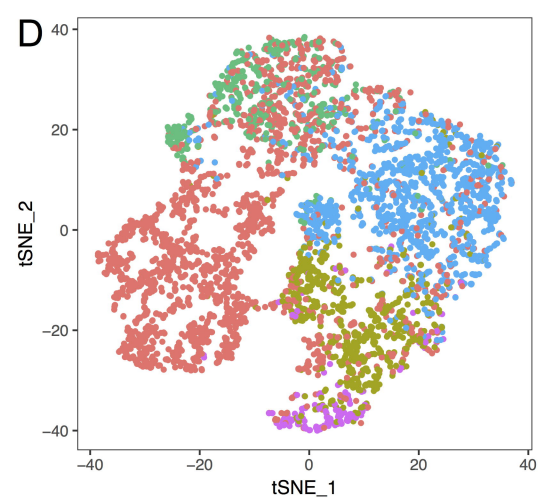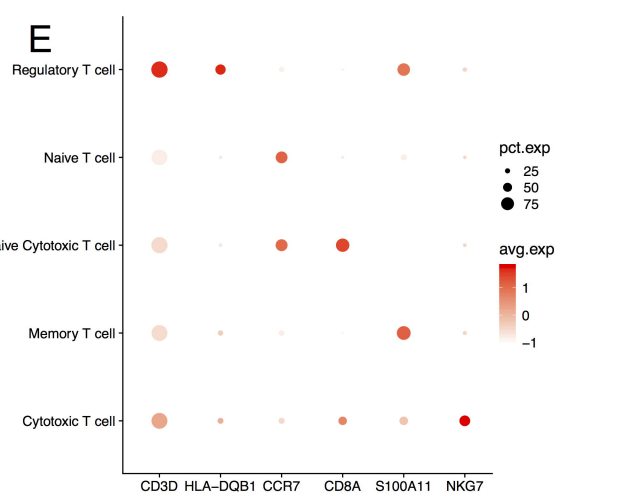

Source: https://www.biorxiv.org/content/biorxiv/early/2019/01/28/532093.full.pdf
